# Supplementary material for: An experimental and theoretical study of the photoisomerization and thermal reversion on 5-arylmethylene-2-thioxoimidazolidin-4-one
Source: Royal Society of Chemistry journal article supplement (doi:10.1039/c4cp04748f), 2015-01-01
Supplement: c4cp04748f1.pdf [file c4cp04748f1.pdf]

# Supporting Information

## EXPERIMENTAL AND THEORETICAL STUDY OF THE PHOTOISOMERIZATION AND THERMAL REVERSION OF 5- ARYLMETHYLENE-2-THIOXOIMIDAZOLIDIN-4-ONE.

Ana J. Pepino, Maxi A. Burgos Paci, Walter Peláez, Gustavo A. Argüello\*

INFIQC, Departamento de Físicoquímica, Facultad de Ciencias Químicas, Universidad Nacional de  
Córdoba, Córdoba, Argentina

### Table of Contents

Plot of thermal reversion progress in CH<sub>3</sub>OH and CHCl<sub>3</sub> at different temperatures (**Figure S.0**)

Computational Data:

Energies and geometrical parameters of the main structures involved in the reaction  
coordinates (**table S.0**)

Cartesian Coordinates and energy from CAS(6/5)/6-31G(G)

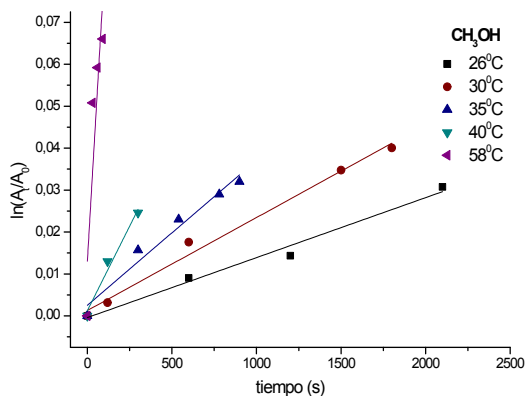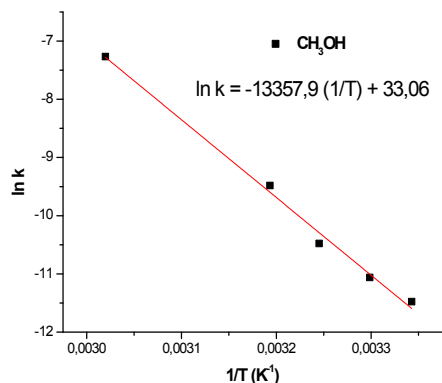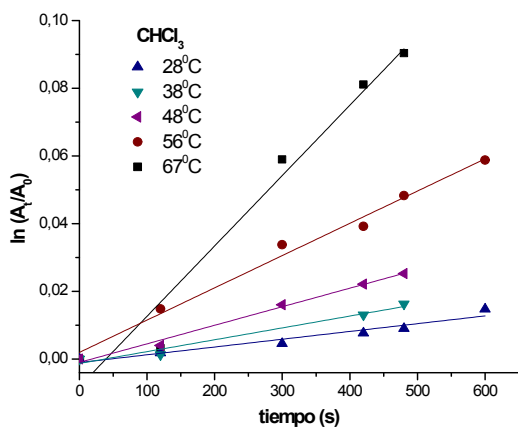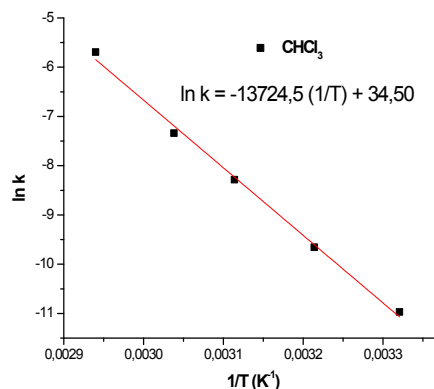

Figure S.0: Plot of thermal reversion progress in CH<sub>3</sub>OH and CHCl<sub>3</sub> at different temperatures

### Cartesian Coordinates and energy from B3LYP/6-31++G(d,p)

S<sub>0</sub>: Z(min)

Energy (a.u.): -968.696089 (in vacuo)

Energy (a.u.): -968.710645 (in Acetonitrile)

|   |             |             |             |
|---|-------------|-------------|-------------|
| C | -1.98465200 | -0.95640400 | 0.48235800  |
| C | -3.20204700 | -1.63336800 | 0.42473200  |
| C | -4.34752400 | -0.98875800 | -0.05225200 |
| C | -4.27038500 | 0.34856100  | -0.45373900 |
| C | -3.05675200 | 1.02929900  | -0.38931900 |
| C | -1.88412000 | 0.38697600  | 0.06140300  |
| H | -1.12546400 | -1.46192400 | 0.91138500  |
| H | -3.25905600 | -2.66341800 | 0.76405100  |
| H | -5.29344200 | -1.51980000 | -0.09795200 |
| H | -5.15727600 | 0.86184200  | -0.81322400 |
| H | -3.00308200 | 2.06916500  | -0.69984400 |
| C | -0.64219000 | 1.15299800  | 0.08921500  |
| H | -0.73355700 | 2.23668200  | 0.09461100  |
| C | 0.63819000  | 0.71922900  | 0.07200000  |

|   |            |             |             |
|---|------------|-------------|-------------|
| C | 1.82226900 | 1.62792400  | 0.12537000  |
| C | 2.54788000 | -0.56653700 | -0.06687900 |
| S | 3.54781300 | -1.87269300 | -0.23307700 |
| O | 1.86418100 | 2.84038400  | 0.21732200  |
| N | 2.91451700 | 0.76186000  | 0.04993600  |
| N | 1.17532300 | -0.56851800 | -0.01807100 |
| H | 0.66065200 | -1.41587700 | -0.20386400 |
| H | 3.87986900 | 1.06042300  | 0.05510400  |

**S<sub>0</sub>: E(min)**

**Energy (a.u.):** -968.692480 (in vacuo)

**Energy (a.u.):** -968.709532 (in Acetonitrile)

|   |             |             |             |
|---|-------------|-------------|-------------|
| C | 2.33692200  | 0.87339500  | -0.00007100 |
| C | 3.69694500  | 1.17722600  | -0.00011200 |
| C | 4.65978300  | 0.16274000  | -0.00007200 |
| C | 4.25255900  | -1.17493200 | 0.00002400  |
| C | 2.89612000  | -1.48636700 | 0.00012900  |
| C | 1.90859900  | -0.47306300 | 0.00007600  |
| H | 1.60234000  | 1.66830200  | -0.00023400 |
| H | 4.00673300  | 2.21821800  | -0.00016700 |
| H | 5.71688300  | 0.41183300  | -0.00012200 |
| H | 4.98983700  | -1.97223200 | -0.00002500 |
| H | 2.58724900  | -2.52877500 | 0.00026500  |
| C | 0.52222700  | -0.92039200 | 0.00019300  |
| H | 0.42999600  | -2.00707200 | 0.00036500  |
| C | -0.67745100 | -0.27978400 | -0.00015600 |
| C | -1.08105400 | 1.16023300  | 0.00006900  |
| C | -2.99458500 | -0.15954400 | -0.00000200 |
| S | -4.59232300 | -0.59430800 | -0.00003800 |
| O | -0.41184200 | 2.18088600  | 0.00003400  |
| N | -2.47329000 | 1.12228200  | 0.00030900  |
| N | -1.90141500 | -0.97568600 | -0.00032700 |
| H | -2.00317700 | -1.97998900 | 0.00005300  |
| H | -3.05542100 | 1.94831000  | -0.00013200 |

**S<sub>0</sub> (max)**

**Energy (a.u.):** -968.561227 (in vacuo)

**Energy (a.u.):** -968.601001 (in Acetonitrile)

|   |             |             |             |
|---|-------------|-------------|-------------|
| C | -1.73066300 | -0.75795100 | 0.58987400  |
| C | -2.83225000 | -1.43983300 | 1.06838900  |
| C | -4.08743400 | -1.19723500 | 0.53721600  |
| C | -4.23640500 | -0.26483700 | -0.47609300 |
| C | -3.13742000 | 0.41841800  | -0.95629200 |
| C | -1.86775900 | 0.18062600  | -0.43106900 |
| H | -0.76247800 | -0.95269900 | 1.00571500  |
| H | -2.71159000 | -2.15875200 | 1.85386800  |

|   |             |             |             |
|---|-------------|-------------|-------------|
| H | -4.94045600 | -1.72850900 | 0.90906600  |
| H | -5.20596800 | -0.07164800 | -0.88969900 |
| H | -3.25812100 | 1.14202800  | -1.73897700 |
| C | -0.72008700 | 0.90326000  | -0.96623800 |
| H | -0.86471600 | 1.59708400  | -1.77177900 |
| C | 0.65140000  | 0.72658200  | -0.42930600 |
| C | 1.33385500  | 1.48546900  | 0.65971000  |
| C | 2.76535300  | -0.10905200 | -0.19990900 |
| S | 4.15302000  | -1.06613000 | -0.44326700 |
| O | 0.93850000  | 2.39053000  | 1.34861500  |
| N | 2.60251300  | 0.88890600  | 0.70549500  |
| N | 1.59232400  | -0.19773200 | -0.87464700 |
| H | 1.44757800  | -0.86592000 | -1.60043600 |
| H | 3.32535200  | 1.16669900  | 1.33441100  |

### T<sub>1</sub> (min)

**Energy (a.u.):** -968.634707 (in vacuo)

**Energy (a.u.):** -968.651895 (in Acetonitrile)

|   |             |             |             |
|---|-------------|-------------|-------------|
| C | -1.86227200 | -0.59772600 | 0.75175400  |
| C | -3.03773000 | -1.12461500 | 1.27029700  |
| C | -4.26593700 | -0.89365300 | 0.63020600  |
| C | -4.30538100 | -0.12157700 | -0.54275900 |
| C | -3.13848000 | 0.41202600  | -1.07102000 |
| C | -1.87804200 | 0.18826200  | -0.43919200 |
| H | -0.91916500 | -0.78327300 | 1.25674900  |
| H | -3.00446700 | -1.71968500 | 2.17812100  |
| H | -5.18097800 | -1.30956700 | 1.04022000  |
| H | -5.25358400 | 0.05975200  | -1.04011000 |
| H | -3.17281900 | 1.00914900  | -1.97793700 |
| C | -0.70121900 | 0.74117500  | -1.00454200 |
| H | -0.78929800 | 1.34900100  | -1.90333600 |
| C | 0.63761300  | 0.57575800  | -0.44800900 |
| C | 1.39440600  | 1.48157100  | 0.40037000  |
| C | 2.69073800  | -0.36362900 | -0.08262300 |
| S | 3.95027400  | -1.45777600 | -0.15010900 |
| O | 1.08090000  | 2.57538100  | 0.88158300  |
| N | 2.63035600  | 0.83328800  | 0.57524000  |
| N | 1.46208000  | -0.48800800 | -0.69654200 |
| H | 1.22446200  | -1.29127000 | -1.26625000 |
| H | 3.39503400  | 1.20473000  | 1.12384900  |

### 1,3-H-shift TS

**Energy (a.u.):** -968.583196 (in vacuo)

**Energy (a.u.):** -968.602754 (in Acetonitrile)

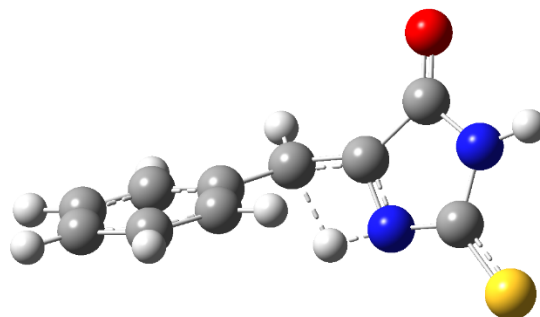

|   |             |             |             |
|---|-------------|-------------|-------------|
| C | -3.05675100 | 0.70780800  | -0.83902400 |
| C | -4.21974100 | 0.06184200  | -0.42190800 |
| C | -4.15893000 | -0.95440000 | 0.53548100  |
| C | -2.91774800 | -1.31121900 | 1.07256400  |
| C | -1.75183000 | -0.66817300 | 0.65983900  |
| C | -1.80139700 | 0.35826700  | -0.30343100 |
| H | -3.11640500 | 1.49746200  | -1.58316100 |
| H | -5.17538600 | 0.35546300  | -0.84673200 |
| H | -5.06357700 | -1.45816700 | 0.86154500  |
| H | -2.85493000 | -2.09239300 | 1.82475200  |
| H | -0.80294000 | -0.96484900 | 1.09500300  |
| C | 0.71831400  | 0.89363700  | -0.31664200 |
| C | 1.82278300  | 1.60486200  | 0.42062000  |
| C | 2.40639900  | -0.58250300 | -0.14428500 |
| S | 3.30511500  | -1.94995700 | -0.28168400 |
| O | 1.88112700  | 2.73391900  | 0.86321600  |
| N | 2.78303200  | 0.59703000  | 0.50858000  |
| N | 1.15923200  | -0.30291500 | -0.69899700 |
| C | -0.60594200 | 1.10389900  | -0.79519300 |
| H | 0.03507000  | -0.15777300 | -1.42858400 |
| H | -0.83800900 | 2.10146400  | -1.16474100 |
| H | 3.67853300  | 0.70383600  | 0.96792800  |

**Table S.0.** Energies and geometrical parameters of the main structures at SA-2-CAS(6/5)/6-31G level.

| Structure     | State          | Energy        | $\Delta E$ (kcalmol <sup>-1</sup> ) | dC-C    | $\varphi$ |
|---------------|----------------|---------------|-------------------------------------|---------|-----------|
| <b>Z</b>      | S <sub>0</sub> | -964,66055510 | ---                                 | 1.32356 | 1.355     |
| <b>TS</b>     | S <sub>0</sub> | -964.52345910 | 77.7                                | 1.48376 | 89.066    |
| <b>E</b>      | S <sub>0</sub> | -964,64813980 | 7.8                                 | 1.32466 | 179.980   |
| <b>ZFC</b>    | S <sub>1</sub> | -964,51246310 | 92.9                                | 1.32356 | 1.355     |
| <b>Z(min)</b> | S <sub>1</sub> | -964.56236770 | 61.6                                | 1.35197 | 2.256     |
| <b>CI</b>     | S <sub>1</sub> | -964.54449379 | 72.8                                | 1.46846 | 135.022   |
| <b>EFC</b>    | S <sub>1</sub> | -964.54810490 | 70.6                                | 1.36000 | 179.980   |
| <b>E(min)</b> | S <sub>1</sub> | -964,57992520 | 40.0                                | 1.41270 | 171.661   |
| <b>ZFC</b>    | S <sub>2</sub> | -964.49799044 | 102.0                               | 1.32356 | 1.355     |

|                |                |                                                                |      |         |         |
|----------------|----------------|----------------------------------------------------------------|------|---------|---------|
| <b>Z(min)</b>  | S <sub>2</sub> | -964.51130170                                                  | 93.6 | 1.45880 | 50.626  |
| <b>CI</b>      | S <sub>2</sub> | -964.48658413                                                  | 91.7 | 1.45559 | 117.121 |
| <b>EFC</b>     | S <sub>2</sub> | -964.50474220                                                  | 97.8 | 1.36000 | 179.980 |
| <b>E(min)</b>  | S <sub>2</sub> | -964.49902285                                                  | 85.2 | 1.41641 | 179.976 |
| <b>ZFC</b>     | T <sub>1</sub> | -964,51781150                                                  | 89.6 | 1.32356 | 1.355   |
| <b>TW(min)</b> | T <sub>1</sub> | -964.57167560<br>(in vacuo)<br>-964.60151770<br>(acetonitrile) | 55.8 | 1.45937 | 76.683  |
| <b>EFC</b>     | T <sub>1</sub> | -964.54058300                                                  | 75.3 | 1.36000 | 179.980 |
| <b>E(min)</b>  | T <sub>1</sub> | -964.56387450                                                  | 60.7 | 1.49873 | 179.858 |

### Cartesian Coordinates and energy from CAS(6/5)/6-31G(d)

**S<sub>0</sub>: Z(min)**

**Energy (a.u.): -964.66055510**

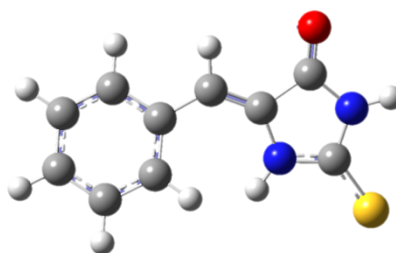

|   |             |             |             |
|---|-------------|-------------|-------------|
| C | -1.99545400 | -0.81071400 | 0.71270500  |
| C | -3.17408900 | -1.50766200 | 0.63295000  |
| C | -4.26418000 | -0.97711500 | -0.06721700 |
| C | -4.15795600 | 0.25441500  | -0.66290800 |
| C | -2.96039600 | 0.97416400  | -0.57908100 |
| C | -1.86490100 | 0.44555000  | 0.08887400  |
| H | -1.18090200 | -1.21008000 | 1.28961000  |
| H | -3.26464300 | -2.46184500 | 1.11996400  |
| H | -5.18332700 | -1.53135600 | -0.12639500 |
| H | -4.99251300 | 0.67456100  | -1.19446200 |
| H | -2.88480700 | 1.93880900  | -1.04900800 |
| C | -0.60883800 | 1.22037900  | 0.13955800  |
| H | -0.68822600 | 2.29143700  | 0.19441700  |
| C | 0.62906400  | 0.75445100  | 0.09151200  |
| C | 1.85281300  | 1.60408600  | 0.15744200  |
| C | 2.46290600  | -0.59086200 | -0.09673300 |
| S | 3.41525900  | -1.92310300 | -0.30150100 |
| O | 1.94522800  | 2.78087700  | 0.27663800  |
| N | 2.88854200  | 0.69797700  | 0.04856600  |
| N | 1.11834400  | -0.54988900 | -0.04173700 |
| H | 0.57282100  | -1.36107800 | -0.22373800 |
| H | 3.85361000  | 0.94542700  | 0.05010100  |

### S<sub>0</sub>-E

Energy (a.u.): -964,64813980

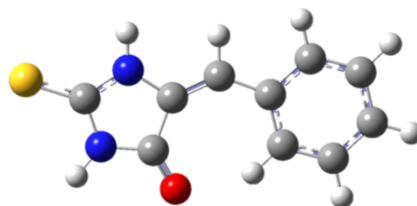

|   |             |             |             |
|---|-------------|-------------|-------------|
| C | 2.33692200  | 0.87339500  | -0.00007100 |
| C | 3.69694500  | 1.17722600  | -0.00011200 |
| C | 4.65978300  | 0.16274000  | -0.00007200 |
| C | 4.25255900  | -1.17493200 | 0.00002400  |
| C | 2.89612000  | -1.48636700 | 0.00012900  |
| C | 1.90859900  | -0.47306300 | 0.00007600  |
| H | 1.60234000  | 1.66830200  | -0.00023400 |
| H | 4.00673300  | 2.21821800  | -0.00016700 |
| H | 5.71688300  | 0.41183300  | -0.00012200 |
| H | 4.98983700  | -1.97223200 | -0.00002500 |
| H | 2.58724900  | -2.52877500 | 0.00026500  |
| C | 0.52222700  | -0.92039200 | 0.00019300  |
| H | 0.42999600  | -2.00707200 | 0.00036500  |
| C | -0.67745100 | -0.27978400 | -0.00015600 |
| C | -1.08105400 | 1.16023300  | 0.00006900  |
| C | -2.99458500 | -0.15954400 | -0.00000200 |
| S | -4.59232300 | -0.59430800 | -0.00003800 |
| O | -0.41184200 | 2.18088600  | 0.00003400  |
| N | -2.47329000 | 1.12228200  | 0.00030900  |
| N | -1.90141500 | -0.97568600 | -0.00032700 |
| H | -2.00317700 | -1.97998900 | 0.00005300  |
| H | -3.05542100 | 1.94831000  | -0.00013200 |

### S<sub>0</sub>-TS

Energy (a.u.): -964.52345910

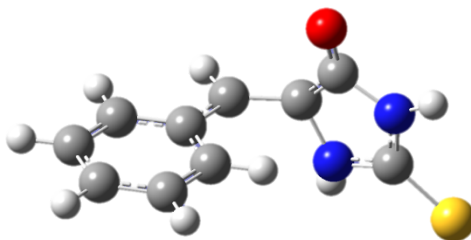

|   |             |             |             |
|---|-------------|-------------|-------------|
| C | -1.51398000 | -0.61134600 | 0.58621000  |
| C | -2.55721300 | -1.30611900 | 1.14965700  |
| C | -3.84449100 | -1.13528300 | 0.64248000  |
| C | -4.11294700 | -0.27884800 | -0.42917900 |
| C | -3.07583200 | 0.41435900  | -0.99791000 |
| C | -1.75294600 | 0.26393100  | -0.50411200 |
| H | -0.51535000 | -0.72228700 | 0.95904800  |
| H | -2.38712100 | -1.97074800 | 1.97519300  |
| H | -4.65749600 | -1.67866400 | 1.09025600  |
| H | -5.11672800 | -0.16839500 | -0.79359400 |
| H | -3.25450700 | 1.08241500  | -1.82132600 |
| C | -0.71496200 | 0.98272100  | -1.09857900 |
| H | -1.02215600 | 1.61201900  | -1.92471100 |
| C | 0.70216100  | 0.97206100  | -0.71532700 |
| C | 1.10028700  | 1.39786500  | 0.56307200  |
| C | 2.49270600  | -0.29556000 | -0.11828600 |
| S | 3.81498600  | -1.32978800 | -0.20274900 |
| O | 0.61827300  | 2.19071300  | 1.35149500  |
| N | 2.23716600  | 0.61582200  | 0.83763200  |
| N | 1.49264000  | -0.19855000 | -1.01163300 |
| H | 1.70579500  | -0.48577700 | -1.94186700 |
| H | 2.81626300  | 0.73876200  | 1.63887700  |

### S<sub>1</sub>-Z(FC)

Energy (a.u.): -964,51246310

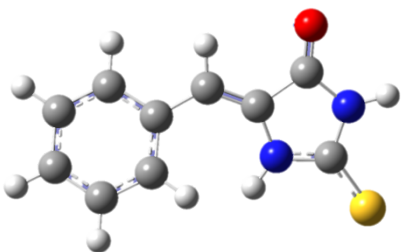

### S<sub>1</sub>-Z(min)

Energy (a.u.): -964.56236770

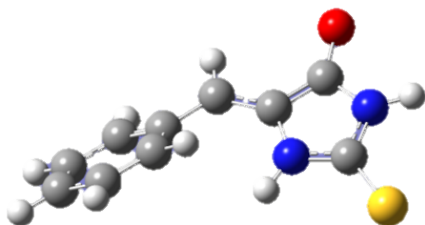

|   |             |             |            |
|---|-------------|-------------|------------|
| C | -1.95755200 | -0.71884200 | 0.75224900 |
| C | -3.11752500 | -1.46344600 | 0.72589300 |



|   |             |             |             |
|---|-------------|-------------|-------------|
| C | -4.23309600 | -1.00873800 | 0.00295800  |
| C | -4.16244800 | 0.18378100  | -0.66521000 |
| C | -2.98341400 | 0.94119100  | -0.64069300 |
| C | -1.87138200 | 0.50586800  | 0.04578400  |
| H | -1.12750100 | -1.05400500 | 1.34754400  |
| H | -3.17224700 | -2.38724500 | 1.27303800  |
| H | -5.13595600 | -1.59188200 | -0.01475000 |
| H | -5.01079800 | 0.54786000  | -1.21650900 |
| H | -2.94630800 | 1.87402200  | -1.17554700 |
| C | -0.65509800 | 1.33118300  | 0.05897400  |
| H | -0.77496800 | 2.39732900  | 0.01690800  |
| C | 0.67248100  | 0.85317500  | 0.05257600  |
| C | 1.85722200  | 1.52964600  | 0.16404700  |
| C | 2.42218000  | -0.61996700 | -0.10953000 |
| S | 3.31775200  | -2.02056100 | -0.29988600 |
| O | 2.11596300  | 2.84842500  | 0.33522800  |
| N | 2.90556600  | 0.62886500  | 0.06791300  |
| N | 1.08853100  | -0.48879300 | -0.10291500 |
| H | 0.49040600  | -1.25691200 | -0.30409300 |
| H | 3.87874500  | 0.82880000  | 0.11248500  |

### S<sub>1</sub>-E(FC)

Energy (a.u.): -964.54810490

|   |             |             |             |
|---|-------------|-------------|-------------|
| C | 2.33692200  | 0.87339500  | -0.00007100 |
| C | 3.69694500  | 1.17722600  | -0.00011200 |
| C | 4.65978300  | 0.16274000  | -0.00007200 |
| C | 4.25255900  | -1.17493200 | 0.00002400  |
| C | 2.89612000  | -1.48636700 | 0.00012900  |
| C | 1.90859900  | -0.47306300 | 0.00007600  |
| H | 1.60234000  | 1.66830200  | -0.00023400 |
| H | 4.00673300  | 2.21821800  | -0.00016700 |
| H | 5.71688300  | 0.41183300  | -0.00012200 |
| H | 4.98983700  | -1.97223200 | -0.00002500 |
| H | 2.58724900  | -2.52877500 | 0.00026500  |
| C | 0.52222700  | -0.92039200 | 0.00019300  |
| H | 0.42999600  | -2.00707200 | 0.00036500  |
| C | -0.67745100 | -0.27978400 | -0.00015600 |
| C | -1.08105400 | 1.16023300  | 0.00006900  |
| C | -2.99458500 | -0.15954400 | -0.00000200 |
| S | -4.59232300 | -0.59430800 | -0.00003800 |
| O | -0.41184200 | 2.18088600  | 0.00003400  |
| N | -2.47329000 | 1.12228200  | 0.00030900  |
| N | -1.90141500 | -0.97568600 | -0.00032700 |
| H | -2.00317700 | -1.97998900 | 0.00005300  |
| H | -3.05542100 | 1.94831000  | -0.00013200 |

### S<sub>1</sub>-E(min)

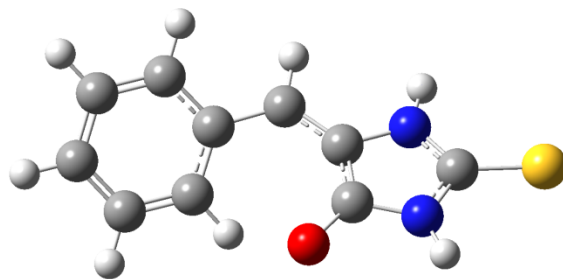

**Energy (a.u.): -959.55754290**

|   |             |             |             |
|---|-------------|-------------|-------------|
| C | -2.22664200 | 0.70278200  | 0.51620100  |
| C | -3.52961100 | 1.15704400  | 0.41781000  |
| C | -4.52954200 | 0.31845300  | -0.03867900 |
| C | -4.22160300 | -0.98499000 | -0.39273000 |
| C | -2.92225100 | -1.44030000 | -0.29816000 |
| C | -1.90264900 | -0.59982000 | 0.14716000  |
| H | -1.47179400 | 1.35737700  | 0.90037000  |
| H | -3.76196000 | 2.16259400  | 0.70647300  |
| H | -5.53813500 | 0.67264500  | -0.11231700 |
| H | -4.99179000 | -1.64286200 | -0.74286700 |
| H | -2.68851200 | -2.44897600 | -0.57828800 |
| C | -0.53690800 | -1.12772900 | 0.24320100  |
| H | -0.41980600 | -2.17815000 | 0.42148100  |
| C | 0.64297600  | -0.37403500 | 0.05464900  |
| C | 0.90980200  | 0.89110500  | -0.44633400 |
| C | 2.92076600  | -0.02701500 | 0.03216400  |
| S | 4.62455500  | -0.24842900 | 0.21483600  |
| O | 0.10487400  | 1.91580500  | -0.90804700 |
| N | 2.29727200  | 1.07582600  | -0.43996700 |
| N | 1.94188500  | -0.89317700 | 0.32798700  |
| H | 2.12691600  | -1.79192200 | 0.71639200  |
| H | 2.78643400  | 1.88987000  | -0.74122800 |

**S<sub>1</sub>-Cl1**

**Energy (a.u.): -964.51958580**

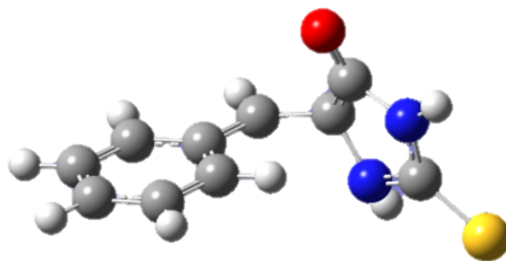

|   |             |             |            |
|---|-------------|-------------|------------|
| C | -1.43987400 | -0.57262500 | 0.57446900 |
| C | -2.45969000 | -1.26567600 | 1.16569000 |

|   |             |             |             |
|---|-------------|-------------|-------------|
| C | -3.75548700 | -1.10217100 | 0.67548000  |
| C | -4.07090900 | -0.25953800 | -0.40844800 |
| C | -3.06346900 | 0.42900500  | -1.00298600 |
| C | -1.71333700 | 0.29567500  | -0.53285900 |
| H | -0.43184800 | -0.66050400 | 0.91864400  |
| H | -2.27566300 | -1.91902800 | 1.99548500  |
| H | -4.55477000 | -1.64521700 | 1.14713600  |
| H | -5.08670700 | -0.17158900 | -0.74081500 |
| H | -3.25730800 | 1.08615200  | -1.83012300 |
| C | -0.70760400 | 1.00391700  | -1.13786400 |
| H | -1.05375200 | 1.62265200  | -1.95979700 |
| C | 0.71631200  | 1.02652000  | -0.78457400 |
| C | 1.01518000  | 1.37336800  | 0.52258600  |
| C | 2.39795800  | -0.35557300 | -0.09661600 |
| S | 3.69012200  | -1.45189100 | -0.13187200 |
| O | 0.47704400  | 2.11537200  | 1.34617700  |
| N | 2.12381900  | 0.53862400  | 0.85307700  |
| N | 1.45907800  | -0.20624800 | -1.05132600 |
| H | 1.78062000  | -0.42287100 | -1.96982600 |
| H | 2.66483300  | 0.63094900  | 1.68300900  |

## S<sub>2</sub>-Z(FC)

Energy (a.u.): -964.49799044

|   |             |             |             |
|---|-------------|-------------|-------------|
| C | -1.99545400 | -0.81071400 | 0.71270500  |
| C | -3.17408900 | -1.50766200 | 0.63295000  |
| C | -4.26418000 | -0.97711500 | -0.06721700 |
| C | -4.15795600 | 0.25441500  | -0.66290800 |
| C | -2.96039600 | 0.97416400  | -0.57908100 |
| C | -1.86490100 | 0.44555000  | 0.08887400  |
| H | -1.18090200 | -1.21008000 | 1.28961000  |
| H | -3.26464300 | -2.46184500 | 1.11996400  |
| H | -5.18332700 | -1.53135600 | -0.12639500 |
| H | -4.99251300 | 0.67456100  | -1.19446200 |
| H | -2.88480700 | 1.93880900  | -1.04900800 |
| C | -0.60883800 | 1.22037900  | 0.13955800  |
| H | -0.68822600 | 2.29143700  | 0.19441700  |
| C | 0.62906400  | 0.75445100  | 0.09151200  |
| C | 1.85281300  | 1.60408600  | 0.15744200  |
| C | 2.46290600  | -0.59086200 | -0.09673300 |
| S | 3.41525900  | -1.92310300 | -0.30150100 |
| O | 1.94522800  | 2.78087700  | 0.27663800  |
| N | 2.88854200  | 0.69797700  | 0.04856600  |
| N | 1.11834400  | -0.54988900 | -0.04173700 |
| H | 0.57282100  | -1.36107800 | -0.22373800 |
| H | 3.85361000  | 0.94542700  | 0.05010100  |

## S<sub>2</sub>-E(FC)

**Energy (a.u.): -964.50474220**

|   |             |             |             |
|---|-------------|-------------|-------------|
| C | 2.33692200  | 0.87339500  | -0.00007100 |
| C | 3.69694500  | 1.17722600  | -0.00011200 |
| C | 4.65978300  | 0.16274000  | -0.00007200 |
| C | 4.25255900  | -1.17493200 | 0.00002400  |
| C | 2.89612000  | -1.48636700 | 0.00012900  |
| C | 1.90859900  | -0.47306300 | 0.00007600  |
| H | 1.60234000  | 1.66830200  | -0.00023400 |
| H | 4.00673300  | 2.21821800  | -0.00016700 |
| H | 5.71688300  | 0.41183300  | -0.00012200 |
| H | 4.98983700  | -1.97223200 | -0.00002500 |
| H | 2.58724900  | -2.52877500 | 0.00026500  |
| C | 0.52222700  | -0.92039200 | 0.00019300  |
| H | 0.42999600  | -2.00707200 | 0.00036500  |
| C | -0.67745100 | -0.27978400 | -0.00015600 |
| C | -1.08105400 | 1.16023300  | 0.00006900  |
| C | -2.99458500 | -0.15954400 | -0.00000200 |
| S | -4.59232300 | -0.59430800 | -0.00003800 |
| O | -0.41184200 | 2.18088600  | 0.00003400  |
| N | -2.47329000 | 1.12228200  | 0.00030900  |
| N | -1.90141500 | -0.97568600 | -0.00032700 |
| H | -2.00317700 | -1.97998900 | 0.00005300  |
| H | -3.05542100 | 1.94831000  | -0.00013200 |

**S<sub>2</sub>-Z(min)**

**Energy (a.u.): -964.51130170**

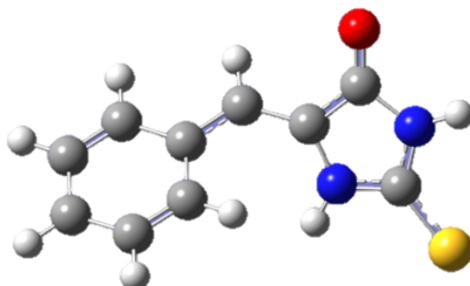

|   |             |             |             |
|---|-------------|-------------|-------------|
| C | -1.84656200 | -0.77842100 | 0.66192800  |
| C | -2.95451900 | -1.48147300 | 0.89997700  |
| C | -4.23178600 | -1.09262600 | 0.32450600  |
| C | -4.28461400 | 0.11999200  | -0.48045000 |
| C | -3.18317000 | 0.82938300  | -0.72053000 |
| C | -1.87452600 | 0.41406800  | -0.19797000 |
| H | -0.91698400 | -1.06893400 | 1.11525300  |
| H | -2.91806000 | -2.34781100 | 1.53561900  |
| H | -5.11174800 | -1.68000700 | 0.49308400  |
| H | -5.23221900 | 0.43541100  | -0.87812300 |
| H | -3.22710900 | 1.72392000  | -1.31605400 |
| C | -0.71238100 | 1.16186600  | -0.53065200 |
| H | -0.82881300 | 2.09394100  | -1.05155200 |
| C | 0.65545900  | 0.77340200  | -0.20477500 |
| C | 1.70668500  | 1.57567900  | 0.34446400  |
| C | 2.54032700  | -0.49864300 | -0.12546600 |
| S | 3.56282600  | -1.79576900 | -0.28786300 |
| O | 1.68545000  | 2.72956900  | 0.72206100  |
| N | 2.82389200  | 0.72449200  | 0.36292500  |
| N | 1.22664900  | -0.45845700 | -0.46341800 |
| H | 0.77424300  | -1.23819100 | -0.88499000 |
| H | 3.72860400  | 0.97582000  | 0.69334600  |

**T<sub>1</sub>-E(FC)**

**Energy (a.u.): -964.54058300**

|   |            |             |             |
|---|------------|-------------|-------------|
| C | 2.33692200 | 0.87339500  | -0.00007100 |
| C | 3.69694500 | 1.17722600  | -0.00011200 |
| C | 4.65978300 | 0.16274000  | -0.00007200 |
| C | 4.25255900 | -1.17493200 | 0.00002400  |
| C | 2.89612000 | -1.48636700 | 0.00012900  |
| C | 1.90859900 | -0.47306300 | 0.00007600  |
| H | 1.60234000 | 1.66830200  | -0.00023400 |
| H | 4.00673300 | 2.21821800  | -0.00016700 |

|   |             |             |             |
|---|-------------|-------------|-------------|
| H | 5.71688300  | 0.41183300  | -0.00012200 |
| H | 4.98983700  | -1.97223200 | -0.00002500 |
| H | 2.58724900  | -2.52877500 | 0.00026500  |
| C | 0.52222700  | -0.92039200 | 0.00019300  |
| H | 0.42999600  | -2.00707200 | 0.00036500  |
| C | -0.67745100 | -0.27978400 | -0.00015600 |
| C | -1.08105400 | 1.16023300  | 0.00006900  |
| C | -2.99458500 | -0.15954400 | -0.00000200 |
| S | -4.59232300 | -0.59430800 | -0.00003800 |
| O | -0.41184200 | 2.18088600  | 0.00003400  |
| N | -2.47329000 | 1.12228200  | 0.00030900  |
| N | -1.90141500 | -0.97568600 | -0.00032700 |
| H | -2.00317700 | -1.97998900 | 0.00005300  |
| H | -3.05542100 | 1.94831000  | -0.00013200 |

## T<sub>1</sub>-TW

Energy (a.u.): -964.57167560

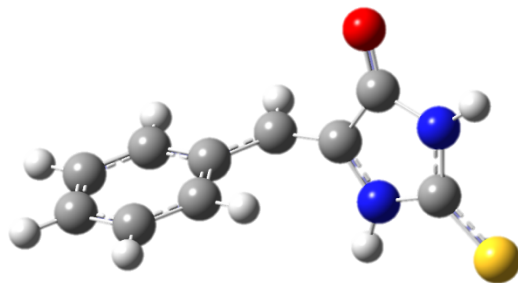

|   |             |             |             |
|---|-------------|-------------|-------------|
| C | -1.83935400 | -0.66716100 | 0.69789300  |
| C | -3.00508800 | -1.26040500 | 1.16208800  |
| C | -4.24094000 | -0.96678800 | 0.56620400  |
| C | -4.29804200 | -0.06171900 | -0.50600500 |
| C | -3.14117500 | 0.53822200  | -0.97889100 |
| C | -1.87143900 | 0.25211800  | -0.39314900 |
| H | -0.89071600 | -0.89459200 | 1.17448800  |
| H | -2.95844200 | -1.95429600 | 1.99635900  |
| H | -5.14877100 | -1.43460700 | 0.93433100  |
| H | -5.25321500 | 0.17176200  | -0.96721800 |

|   |             |             |             |
|---|-------------|-------------|-------------|
| H | -3.18952500 | 1.23977300  | -1.80723300 |
| C | -0.70419400 | 0.87307400  | -0.90252200 |
| H | -0.81324600 | 1.60144800  | -1.70420900 |
| C | 0.64305000  | 0.65199700  | -0.38695700 |
| C | 1.46817500  | 1.53461200  | 0.41186900  |
| C | 2.66495300  | -0.39576000 | -0.07499900 |
| S | 3.81664300  | -1.58517600 | -0.22324400 |
| O | 1.22552400  | 2.64822900  | 0.86511800  |
| N | 2.70341500  | 0.82043300  | 0.57374100  |
| N | 1.40121000  | -0.45813700 | -0.63879600 |
| H | 1.12261800  | -1.25342400 | -1.19801600 |
| H | 3.47276400  | 1.17570200  | 1.10466900  |

### T<sub>1</sub>-E(min)

Energy (a.u.): -964.56387450

|   |             |             |             |
|---|-------------|-------------|-------------|
| C | 2.33122400  | 0.81848800  | 0.00078600  |
| C | 3.67552600  | 1.14859900  | 0.00138400  |
| C | 4.64842600  | 0.16379900  | 0.00088800  |
| C | 4.27079300  | -1.17287500 | -0.00021000 |
| C | 2.93560200  | -1.51135900 | -0.00079400 |
| C | 1.93497800  | -0.52407700 | -0.00032100 |
| H | 1.59555500  | 1.59661700  | 0.00104000  |
| H | 3.96063600  | 2.18523700  | 0.00214200  |
| H | 5.68979000  | 0.43087300  | 0.00133100  |
| H | 5.01799800  | -1.94596800 | -0.00063500 |
| H | 2.65267200  | -2.54954700 | -0.00171200 |
| C | 0.56745700  | -0.97418300 | -0.00113900 |
| H | 0.40644100  | -2.03550900 | -0.00197900 |
| C | -0.71302000 | -0.19535100 | -0.00084000 |
| C | -1.10887300 | 1.19656200  | -0.00232400 |
| C | -2.98851200 | -0.11873300 | 0.00118200  |
| S | -4.55682900 | -0.63207400 | 0.00387000  |
| O | -0.47824500 | 2.21615600  | -0.00361600 |
| N | -2.50675200 | 1.13792200  | -0.00132600 |
| N | -1.87742800 | -0.90895500 | 0.00119100  |
| H | -1.95451500 | -1.90168200 | 0.00291400  |
| H | -3.08728800 | 1.94734100  | -0.00177400 |

### ISC- E

|   |          |           |           |
|---|----------|-----------|-----------|
| N | 1.401109 | -0.535364 | 0.589936  |
| C | 0.629317 | 0.617303  | 0.414975  |
| C | 1.531246 | 1.583154  | -0.280922 |
| N | 2.723842 | 0.875151  | -0.439702 |

|   |           |           |           |
|---|-----------|-----------|-----------|
| C | 2.659179  | -0.415848 | 0.052075  |
| C | -0.654053 | 0.890101  | 0.741116  |
| C | -1.881690 | 0.217422  | 0.328366  |
| C | -1.930041 | -1.123172 | -0.110328 |
| C | -3.136781 | -1.704903 | -0.496359 |
| C | -4.323238 | -0.966214 | -0.453824 |
| C | -4.296776 | 0.356875  | -0.001826 |
| C | -3.093379 | 0.937508  | 0.392080  |
| O | 1.314526  | 2.726203  | -0.636932 |
| S | 3.842137  | -1.569751 | 0.000625  |
| H | -1.034832 | -1.736564 | -0.097341 |
| H | -3.152686 | -2.741357 | -0.820239 |
| H | -5.260854 | -1.421778 | -0.757456 |
| H | -5.214964 | 0.934609  | 0.047350  |
| H | -3.078975 | 1.965001  | 0.745180  |
| H | -0.763324 | 1.761537  | 1.382525  |
| H | 1.066877  | -1.432136 | 0.908545  |
| H | 3.550992  | 1.245219  | -0.886855 |

#### ISC-Z

|   |           |           |           |
|---|-----------|-----------|-----------|
| N | -1.955647 | -1.039222 | 0.166736  |
| C | -0.691152 | -0.566075 | -0.196719 |
| C | -0.915516 | 0.849198  | -0.617768 |
| N | -2.287088 | 1.039384  | -0.440617 |
| C | -2.930603 | -0.077780 | 0.059923  |
| C | 0.522346  | -1.161964 | -0.183947 |
| C | 1.842716  | -0.578599 | 0.031142  |
| C | 2.060556  | 0.629641  | 0.727336  |
| C | 3.348993  | 1.135669  | 0.893213  |
| C | 4.450300  | 0.450498  | 0.370895  |
| C | 4.254492  | -0.758816 | -0.303481 |
| C | 2.968695  | -1.270344 | -0.463260 |
| O | -0.117308 | 1.670730  | -1.027914 |
| S | -4.530722 | -0.223829 | 0.449563  |
| H | 1.230463  | 1.150903  | 1.193220  |
| H | 3.494634  | 2.061518  | 1.441832  |
| H | 5.452094  | 0.848760  | 0.499935  |
| H | 5.104609  | -1.305028 | -0.701246 |
| H | 2.822516  | -2.211847 | -0.985593 |
| H | 0.485101  | -2.227721 | -0.397304 |
| H | -2.153605 | -1.916227 | 0.624008  |
| H | -2.771599 | 1.905368  | -0.631384 |
